# Supplementary material
Source: HighWire-hosted journal article supplement (https://jnm.snmjournals.org/highwire/filestream/95537/field_highwire_adjunct_files/0/228312_Supplemental_Data.pdf)
Supplement: 228312_Supplemental_Data.pdf [file 228312_Supplemental_Data.pdf]

**SUPPLEMENTAL Table 1** Radiomics features ( $n=480$ ) based on the IBSI

| Group                                                     | Amount    | Name                                                                                                                                                                                                                                                                                                                                                                                                                                                                                                                            | Aggregation methods*                                   |
|-----------------------------------------------------------|-----------|---------------------------------------------------------------------------------------------------------------------------------------------------------------------------------------------------------------------------------------------------------------------------------------------------------------------------------------------------------------------------------------------------------------------------------------------------------------------------------------------------------------------------------|--------------------------------------------------------|
| Morphology                                                | 22        | Volume, approximate volume, surface, surface to volume ratio, compactness 1, compactness 2, spherical disproportion, sphericity, asphericity, center of mass shift, maximum 3D diameter, major axis length, minor axis length, least axis length, elongation, flatness, volume density axis-aligned bounding box, area density axis-aligned bounding box, volume density approximate enclosing ellipsoid, integrated intensity, Moran's I index, Geary's C measure                                                              | 3D                                                     |
| Local intensity                                           | 2         | Local intensity peak, global intensity peak                                                                                                                                                                                                                                                                                                                                                                                                                                                                                     | 3D                                                     |
| Intensity-based statistics                                | 18        | Mean, variance, skewness, kurtosis, median, minimum, 10th percentile, 90th percentile, maximum, Interquartile range, range, Mean absolute deviation, Robust mean absolute deviation, Median absolute deviation, Coefficient of variation, Quartile coefficient, Energy, Root mean square                                                                                                                                                                                                                                        | 3D                                                     |
| Intensity-volume histogram                                | 6         | Volume at intensity fraction 10, volume at intensity fraction 90, intensity at volume fraction 10, intensity at volume fraction 90, difference volume at intensity fraction, difference intensity at volume fraction                                                                                                                                                                                                                                                                                                            | 3D                                                     |
| Intensity histogram                                       | 24        | Mean, variance, skewness, kurtosis, median, minimum, 10th percentile, 90th percentile, maximum, mode, Interquartile range, range, Mean absolute deviation, Robust mean absolute deviation, Median absolute deviation, Coefficient of variation, Quartile coefficient, Entropy, Uniformity, Energy, Maximum histogram gradient, Maximum histogram gradient grey level, Minimum histogram gradient, Minimum histogram gradient grey level                                                                                         | 3D                                                     |
| Texture features based on grey level co-occurrence matrix | 25x6= 150 | Joint maximum, joint average, joint variance, joint entropy, difference, average, difference variance, difference entropy, sum average, sum variance, sum entropy, angular second moment, contrast, dissimilarity, inverse difference, inverse difference normalized, inverse difference moment, inverse difference moment normalized, inverse variance, Correlation, autocorrelation, cluster tendency, cluster shade, cluster prominence, first measure of information correlation, second measure of information correlation | 2Davg<br>2DDmrg<br>2DWmrg<br>2Dvmrg<br>3Davg<br>3DWmrg |
| Texture features based on grey level run length matrix    | 16x6= 96  | Short run emphasis, long run emphasis, Low grey level run emphasis, High grey level run emphasis, Short run low grey level emphasis, Short run high grey level emphasis, Long run low grey level emphasis, Long run high grey level emphasis, Grey level non uniformity, Grey level non uniformity normalized, Run length non uniformity, Run length non uniformity normalized, Run percentage, Grey level variance, Run length variance, Run entropy                                                                           | 2Davg<br>2DDmrg<br>2DWmrg<br>2Dvmrg<br>3Davg<br>3DWmrg |
| Texture features based on grey level size zone matrix     | 16x3= 48  | Small zone emphasis, Large zone emphasis, Low grey level zone emphasis, High grey level zone emphasis, Small zone low grey level emphasis, Small zone high grey level emphasis, Large zone low grey level emphasis, Large zone high grey level emphasis, Grey level non uniformity, Grey level non uniformity normalized, Zone size non uniformity, Zone size non uniformity normalized, Zone percentage, Grey level variance, Zone size variance, Zone size entropy                                                            | 2Davg<br>2Dvmrg<br>3D                                  |
| Texture features based on grey level distance zone matrix | 16x3= 48  | Small distance emphasis, Large distance emphasis, Low grey level zone emphasis, High grey level zone emphasis, Small distance low grey level emphasis, Small distance high grey level emphasis, Large distance low grey level emphasis, Large distance high grey level emphasis, Grey level non uniformity, Grey level non uniformity normalized, Zone distance non uniformity, Zone distance non uniformity normalized, Zone percentage, Grey level variance, Zone distance variance, Zone                                     | 2Davg<br>2Dvmrg<br>3D                                  |

---

|                                                                            |          |                                                                                                                                                                                                                                                                                                                                                                                                                                                                                                                                                                    |                       |
|----------------------------------------------------------------------------|----------|--------------------------------------------------------------------------------------------------------------------------------------------------------------------------------------------------------------------------------------------------------------------------------------------------------------------------------------------------------------------------------------------------------------------------------------------------------------------------------------------------------------------------------------------------------------------|-----------------------|
|                                                                            |          | distance entropy                                                                                                                                                                                                                                                                                                                                                                                                                                                                                                                                                   |                       |
| Texture features based on neighborhood grey tone difference based matrix   | 5x3= 15  | Coarseness, contrast, busyness, complexity, strength                                                                                                                                                                                                                                                                                                                                                                                                                                                                                                               | 2Davg<br>2Dvmrg<br>3D |
| Texture features based on neighboring grey level dependence based features | 17x3= 51 | Low dependence emphasis, High dependence emphasis, Low grey level count emphasis, High grey level count emphasis, Low dependence low grey level emphasis, Low dependence high grey level emphasis, High dependence low grey level emphasis, High dependence high grey level emphasis, Grey level non uniformity, Grey level non uniformity normalized, Dependence count non uniformity, Dependence count non uniformity normalized, Dependence count percentage, Grey level variance, Dependence count variance, Dependence count entropy, dependence Count Energy | 2Davg<br>2Dvmrg<br>3D |

---

\* 2D = averaged over slices

2Davg = averaged over slices and directions

2DDmrg = per slice and merged by direction

2Dvmrg = merged over all slices

2Dwmrg = per slice with full merging

3D = a single 3D volume matrix

3Davg = averaged over 3D volume directions

3Dwmrg = 3D volume with full merging

**SUPPLEMENTAL TABLE 2** Conventional PET features and BRAFV600 mutation association per organ region

|                         | <b>BRAFV600</b><br><i>n</i> =35<br>100 lesions | <b>BRAF wild-type</b><br><i>n</i> =35<br>79 lesions | <i>p</i> -value |
|-------------------------|------------------------------------------------|-----------------------------------------------------|-----------------|
| <b>Lymph nodes</b>      | 37 lesions                                     | 32 lesions                                          |                 |
| SUV <sub>max</sub>      | 15.2 (6.4)                                     | 19.8 (13.7)                                         | 0.734           |
| SUV <sub>peak</sub>     | 15.2 (6.4)                                     | 19.8 (13.7)                                         | 0.912           |
| SUV <sub>mean</sub>     | 10.1 (4.2)                                     | 13.2 (9.1)                                          | 0.686           |
| TLG <sub>target</sub> † | 179.5 (283.2)                                  | 178.5 (219.0)                                       | 0.517           |
| <b>Lung</b>             | 5 lesions                                      | 13 lesions                                          |                 |
| SUV <sub>max</sub>      | 10.7 (3.7)                                     | 10.2 (6.0)                                          | 0.959           |
| SUV <sub>peak</sub>     | 8.3 (3.0)                                      | 7.9 (4.5)                                           | 0.926           |
| SUV <sub>mean</sub>     | 7.1 (2.6)                                      | 6.9 (4.1)                                           | 0.903           |
| TLG <sub>target</sub> † | 187.8 (339.6)                                  | 33.5 (30.9)                                         | 0.232           |
| <b>Liver</b>            | 17 lesions                                     | 10 lesions                                          |                 |
| SUV <sub>max</sub>      | 12.1 (3.0)                                     | 14.2 (12.6)                                         | 0.661           |
| SUV <sub>peak</sub>     | 10.0 (2.7)                                     | 12.2 (10.9)                                         | 0.530           |
| SUV <sub>mean</sub>     | 8.1 (2.0)                                      | 9.7 (9.1)                                           | 0.656           |
| TLG <sub>target</sub> † | 250.4 (500.0)                                  | 236.2 (223.9)                                       | 0.339           |
| <b>Bone</b>             | 13 lesions                                     | 6 lesions                                           |                 |
| SUV <sub>max</sub>      | 11.2 (3.6)                                     | 10.5 (2.2)                                          | 0.927           |
| SUV <sub>peak</sub>     | 9.2 (2.9)                                      | 8.1 (1.7)                                           | 0.708           |
| SUV <sub>mean</sub>     | 7.7 (2.5)                                      | 6.6 (1.4)                                           | 0.613           |
| TLG <sub>target</sub> † | 53.9 (34.3)                                    | 57.7 (55.7)                                         | 0.717           |
| <b>Subcutaneous</b>     | 11 lesions                                     | 8 lesions                                           |                 |
| SUV <sub>max</sub>      | 13.8 (4.2)                                     | 11.7 (5.7)                                          | 0.274           |
| SUV <sub>peak</sub>     | 10.6 (3.7)                                     | 8.1 (3.6)                                           | 0.202           |
| SUV <sub>mean</sub>     | 9.2 (2.8)                                      | 7.7 (3.7)                                           | 0.248           |
| TLG <sub>target</sub> † | 200.9 (517.8)                                  | 23.9 (15.1)                                         | 0.116           |
| <b>Other‡</b>           | 15 lesions                                     | 10 lesions                                          |                 |
| SUV <sub>max</sub>      | 13.2 (6.2)                                     | 12.6 (8.1)                                          | 0.981           |
| SUV <sub>peak</sub>     | 11.1 (5.7)                                     | 9.8 (7.0)                                           | 0.853           |
| SUV <sub>mean</sub>     | 8.7 (4.1)                                      | 8.5 (5.7)                                           | 0.951           |
| TLG <sub>target</sub> † | 285.6 (406.6)                                  | 93.6 (156.0)                                        | 0.275           |

Displayed as mean (standard deviation)

†TLG<sub>target</sub>: TLG based on target lesions only

‡Lesions in (*n*=amount of lesions): adrenal glands (*n*=8), peritoneum (*n*=6), pancreas (*n*=2), gall bladder (*n*=1), stomach (*n*=1), intestine (*n*=2), anal canal (*n*=1), intra-orbital (*n*=1), seminal vesicle (*n*=1) and spleen (*n*=2).

No analysis was performed for intramuscular lesions (2 lesions only)

**SUPPLEMENTAL TABLE 3A** Conventional PET features binary logistic regression

| <b>Selected feature name</b> | <b><i>p</i>-value</b> |
|------------------------------|-----------------------|
| SUV <sub>max</sub>           | 0.179                 |
| SUV <sub>peak</sub>          | 0.154                 |
| SUV <sub>mean</sub>          | 0.963                 |
| TLG <sub>target</sub>        | 0.037                 |
| MATV                         | 0.053                 |

**SUPPLEMENTAL TABLE 3B** Method 1 binary logistic regression

| <b>Selected feature name</b>                         | <b><i>p</i>-value</b> |
|------------------------------------------------------|-----------------------|
| asphericity                                          | 0.669                 |
| center of mass shift                                 | 0.966                 |
| elongation                                           | 0.484                 |
| flatness                                             | 0.533                 |
| area density AABB                                    | 0.935                 |
| volume density AEE                                   | 0.500                 |
| Moran's I                                            | 0.991                 |
| Geary's C                                            | 0.758                 |
| stat kurtosis                                        | 0.065                 |
| stat Coefficient of variation                        | 0.747                 |
| volume at intensity fraction 90                      | 0.619                 |
| difference volume at intensity fraction              | 0.183                 |
| IH mode                                              | 0.724                 |
| IH Coefficient of variation                          | 0.024                 |
| IH Quartile coefficient                              | 0.090                 |
| GLCM 2Davg correlation                               | 0.870                 |
| GLCM 2Davg cluster shade                             | 0.358                 |
| GLCM 2DDmrg first measure of information correlation | 0.114                 |
| GLCM 2Dmrg first measure of information correlation  | 0.605                 |
| GLCM 2Dvmrg correlation                              | 0.902                 |
| GLCM 2Dvmrg cluster shade                            | 0.108                 |
| GLCM 2Dvmrg first measure of information correlation | 0.734                 |
| GLDZM 2Davg Grey level variance                      | 0.119                 |

**SUPPLEMENTAL TABLE 3C** Method 2 binary logistic regression

| <b>Selected feature name</b>                          | <b><i>p</i>-value</b> |
|-------------------------------------------------------|-----------------------|
| GLCM 2Davg cluster shade                              | 0.551                 |
| GLCM 2DD mrg first measure of information correlation | 0.534                 |
| GLCM 2Dvmrg second measure of information correlation | 0.745                 |
| difference volume at intensity fraction               | 0.384                 |
| IH mode                                               | 0.738                 |
| center of mass shift                                  | 0.510                 |
| GLCM 2Dvmrg cluster shade                             | 0.397                 |
| stat kurtosis                                         | 0.049                 |
| elongation                                            | 0.424                 |
| stat Quartile coefficient                             | 0.286                 |
| Geary's C                                             | 0.865                 |
| GLDZM 2Davg Grey level variance                       | 0.206                 |
| flatness                                              | 0.361                 |
| GLCM 2Dmrg first measure of information correlation   | 0.824                 |
| volume at intensity fraction 90                       | 0.622                 |
| GLCM 2Dvmrg first measure of information correlation  | 0.642                 |
| IH Quartile coefficient                               | 0.128                 |
| area density AABB                                     | 0.867                 |
| Moran's I                                             | 0.536                 |
| volume density AEE                                    | 0.958                 |
| IH Coefficient of variation                           | 0.035                 |
| ngldm 2Davg dependence Count Energy                   | 0.848                 |
| sphericity                                            | 0.555                 |
| GLDZM 2Dmrg small distance emphasis                   | 0.129                 |
| SUV peak                                              | 0.515                 |
| Volume50                                              | 0.343                 |

**SUPPLEMENTAL TABLE 3D** Method 3 binary logistic regression

| <b>Selected feature name</b>                          | <b><i>p</i>-value</b> |
|-------------------------------------------------------|-----------------------|
| stat Quartile coefficient                             | 0.102                 |
| GLCM 2Dvmrg first measure of information correlation  | 0.025                 |
| GLCM 2Dvmrg second measure of information correlation | 0.599                 |
| GLCM 3DWmrg first measure of information correlation  | 0.217                 |
| IH skewness                                           | 0.308                 |
| GLCM 2Davg cluster shade                              | 0.558                 |
| GLCM 2Davg correlation                                | 0.571                 |
| IH Coefficient of variation                           | 0.255                 |
| asphericity                                           | 0.274                 |
| stat Coefficient of variation                         | 0.090                 |
| Surface to volume ratio                               | 0.035                 |
| GLCM 2DDmrg second measure of information correlation | 0.030                 |
| GLCM 2Dvmrg cluster shade                             | 0.674                 |
| GLCM 2DDmrg first measure of information correlation  | 0.008                 |
| GLCM 2Dvmrg correlation                               | 0.013                 |
| Maximum histogram gradient grey level                 | 0.674                 |
| stat kurtosis                                         | 0.029                 |
| ngtdm 2Davg coarseness                                | 0.444                 |
| Moran's I                                             | 0.404                 |
| flatness                                              | 0.603                 |

**SUPPLEMENTAL TABLE 3E** Method 4 binary logistic regression

| <b>Selected feature name</b>                    | <b><i>p</i>-value</b> |
|-------------------------------------------------|-----------------------|
| IH Entropy                                      | 0.562                 |
| GLCM 2Davg joint entropy                        | 0.055                 |
| GLCM 2Davg inverse difference moment            | 0.200                 |
| GLCM 3Davg inverse difference moment normalized | 0.340                 |
| GLCM 2Davg difference entropy                   | 0.344                 |
| GLCM 2Davg sum average                          | 0.894                 |
| GLCM 2Davg sum entropy                          | 0.194                 |
| GLRLM 2Davg High grey level run emphasis        | 0.665                 |
| GLRLM 2Davg short run emphasis                  | 0.214                 |
| GLSZM 2Dvmrg Zone percentage                    | 0.446                 |

Supplemental Figure 1 PCA: % data variance explained by  $n$  principal components

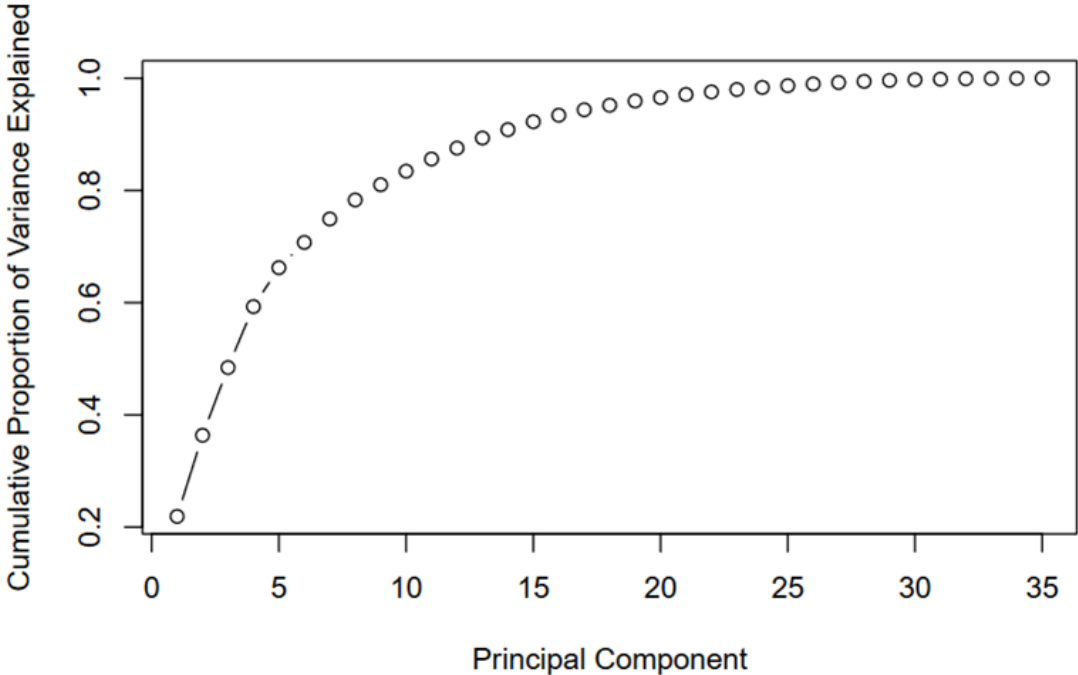

Supplemental Figure 2 Method 5 selected most influential features

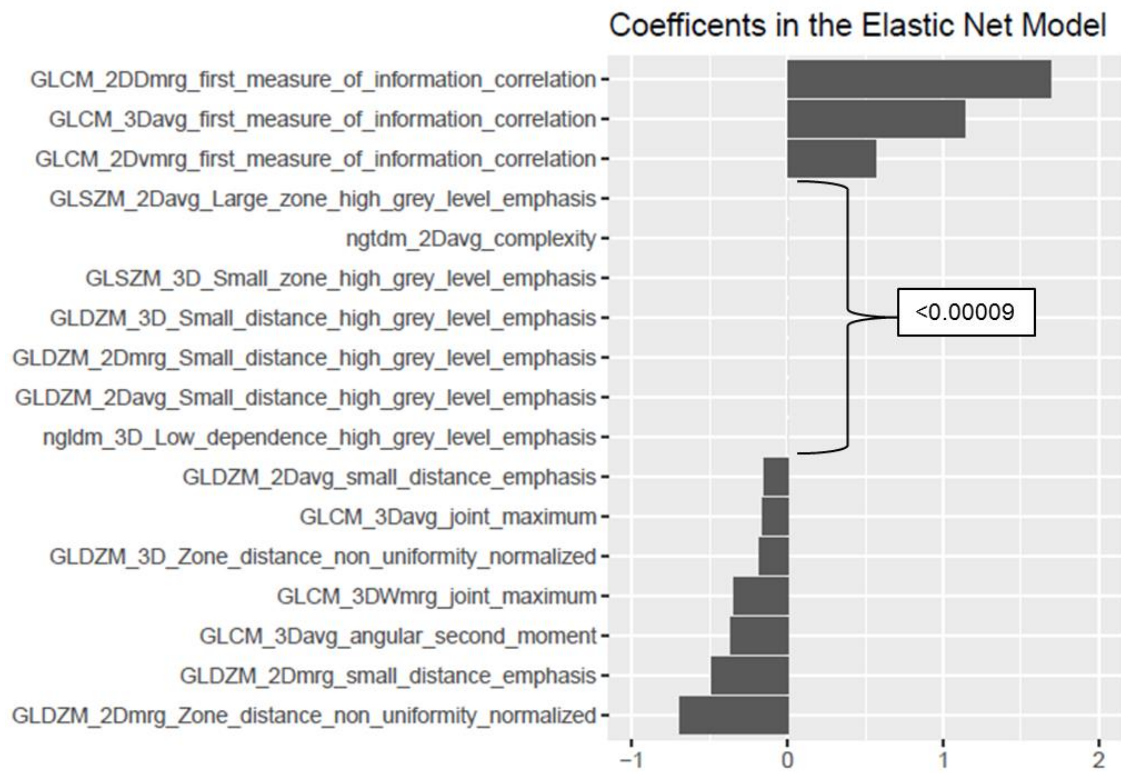



**Supplemental Figure 3** Method 6 most influential features\*

Moran's I  
 GLDZM 3D Zone distance non uniformity normalized  
 GLDZM 2Davg Large distance emphasis  
 GLDZM 3D small distance emphasis  
 GLDZM 2Dmrg Large distance emphasis  
 GLCM 2DDmrg first measure of information correlation  
 GLDZM 2Dmrg Zone distance non uniformity normalized  
 ngtdm 2Dmrg busyness  
 center of mass shift  
 ngtdm 3D contrast  
 GLDZM 2Dmrg small distance emphasis  
 GLCM 3Davg second measure of information correlation  
 ngtdm 3D strength  
 IH kurtosis  
 ngtdm 2Dmrg strength  
 stat skewness  
 stat Quartile coefficient  
 GLDZM 2Davg Zone distance variance  
 GLCM 2DDmrg second measure of information correlation  
 ngtdm 3D busyness

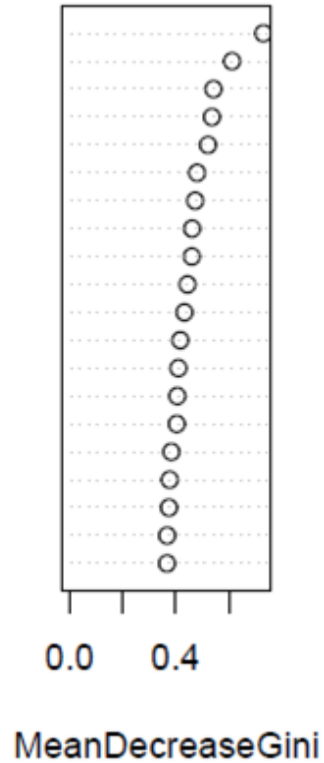

\*Features listed from most influential to least influential – first twenty most influential listed
